# Supplementary material for: Geographic Proximity Dampens Ideological Policy Disagreement in Urban Politics
Source: Research Square preprint supplement (doi:10.21203/rs.3.rs-7188008/v1), 2025-08-29
Supplement: Supplementary file 2 [file c5e8ecb349e5d01981523eac.pdf]

# Supplementary Material: Geographic Proximity Dampens Ideological Policy Disagreement in Urban Politics

July 22, 2025

## Contents

|                                                          |           |
|----------------------------------------------------------|-----------|
| <b>1 Issue Selection and Question Wording</b>            | <b>2</b>  |
| <b>2 OLS Models: Results and Power Analysis</b>          | <b>9</b>  |
| 2.1 OLS Model Results . . . . .                          | 9         |
| 2.2 Analysis: Statistical Power . . . . .                | 9         |
| <b>3 Desirability and Effect Heterogeneity</b>           | <b>13</b> |
| <b>4 Meta-Analysis Results</b>                           | <b>16</b> |
| <b>5 Multilevel Model: Additional Detail and Results</b> | <b>17</b> |
| 5.1 Model Specification . . . . .                        | 17        |
| 5.2 Multilevel Model: Full Table . . . . .               | 17        |

# 1 Issue Selection and Question Wording

Table 1 provides full wording for each of the 40 policy items, along with additional information about policy domain and the tradeoff involved, for each item in our survey.

Table 1: Survey Items

| Item | Variable    | General                                                                                                                                                       | Proximate                                                                                                                                                                          | Tradeoff | Domain            |
|------|-------------|---------------------------------------------------------------------------------------------------------------------------------------------------------------|------------------------------------------------------------------------------------------------------------------------------------------------------------------------------------|----------|-------------------|
| 1    | sochousing  | Municipalities should build more subsidized housing, even if it means increased municipal taxes.                                                              | My municipality should build more subsidized housing in my neighbourhood, even if it means increased municipal taxes.                                                              | Taxes    | Housing           |
| 2    | rehab       | Municipalities should build residential facilities for people who are recovering from alcohol or drug addictions, even if it means increased municipal taxes. | My municipality should build a residential facility in my neighbourhood for people who are recovering from alcohol or drug addictions, even if it means increased municipal taxes. | Taxes    | Social Service    |
| 3    | transitfreq | Municipalities should invest in more frequent public transit services, even if it means increased municipal taxes.                                            | My municipality should invest in more frequent public transit service in my neighbourhood, even if it means increased municipal taxes.                                             | Taxes    | Transport         |
| 4    | police      | Municipalities should invest in new police officers and vehicles to increase police presence, even if it means spending less on other municipal services.     | My municipality should invest in new police officers and vehicles to increase police presence in my neighbourhood, even if it means spending less on other municipal services.     | Services | Safety            |
| 5    | parksrec    | Municipalities should spend more on parks and recreation, even if it means increased municipal taxes.                                                         | My municipality should spend more on parks and recreation in my neighbourhood, even if it means increased municipal taxes.                                                         | Taxes    | Parks and Culture |

Table 1: Survey Items (*continued*)

| Item | Variable    | General                                                                                                                                    | Proximate                                                                                                                                                       | Tradeoff | Domain            |
|------|-------------|--------------------------------------------------------------------------------------------------------------------------------------------|-----------------------------------------------------------------------------------------------------------------------------------------------------------------|----------|-------------------|
| 6    | waste       | Municipalities should increase the frequency of waste collection, even if it means less spending on other municipal services.              | My municipality should increase the frequency of waste collection in my neighbourhood, even if it means less spending on other municipal services.              | Services | Physical Services |
| 7    | artsculture | Municipalities should increase support for cultural and community events, even if it means increased municipal taxes.                      | My municipality should increase support for cultural and community events in my neighbourhood, even if it means increased municipal taxes.                      | Taxes    | Parks and Culture |
| 8    | homeless    | Municipalities should support the construction of shelter facilities for homeless individuals, even if it means increased municipal taxes. | My municipality should support the construction of a shelter facility in my neighbourhood for homeless individuals, even if it means increased municipal taxes. | Taxes    | Social Service    |
| 9    | playground  | Municipalities should build new playground facilities, even if it means increased municipal taxes.                                         | My municipality should build a new playground facility my neighbourhood, even if it means increased municipal taxes.                                            | Taxes    | Parks and Culture |
| 10   | library     | Municipalities should invest in public library facilities, even if it means less spending on other municipal services.                     | My municipality should invest in public library facilities in my neighbourhood, even if it means less spending on other municipal services.                     | Services | Parks and Culture |
| 11   | apartment   | Municipalities should support the construction of mid-rise apartment buildings to increase housing supply.                                 | My municipality should support the construction of mid-rise apartment buildings in my neighbourhood to increase housing supply.                                 | None     | Housing           |
| 12   | roadrepair  | Municipalities should invest more in maintaining and repairing roads, even if it means increased taxes.                                    | My municipality should invest more in maintaining and repairing the roads in my neighbourhood, even if it means increased taxes.                                | Taxes    | Transport         |

Table 1: Survey Items (*continued*)

| Item | Variable      | General                                                                                                        | Proximate                                                                                                                            | Tradeoff | Domain            |
|------|---------------|----------------------------------------------------------------------------------------------------------------|--------------------------------------------------------------------------------------------------------------------------------------|----------|-------------------|
| 13   | roadwiden     | Municipalities should upgrade and widen roads to reduce congestion, even if it means increased taxes.          | My municipality should upgrade and widen roads in my neighbourhood to reduce congestion, even if it means increased taxes.           | Taxes    | Transport         |
| 14   | safeinjection | Municipalities should support the opening of safe injection sites for drug users.                              | My municipality should support the opening of a safe injection site for drug users in my neighbourhood.                              | None     | Social Service    |
| 15   | speed_down    | Municipalities should reduce speed limits in residential areas, even if it increases commute times.            | My municipality should reduce speed limits in residential areas in my neighbourhood, even if it increases commute times.             | Other    | Transport         |
| 16   | bikelanes     | Municipalities should build more bike lanes, even if it means slightly increased commuting times for drivers.  | My municipality should build more bike lanes in my neighbourhood, even if it means slightly increased commuting times for drivers.   | Other    | Transport         |
| 17   | immrefugee    | Municipalities should invest in immigrant and refugee welcome facilities.                                      | My municipality should invest in an immigrant and refugee welcome facility in my neighbourhood.                                      | None     | Social Service    |
| 18   | lowincome     | Municipalities should fund one-stop service centres for low-income families, even if it means increased taxes. | My municipality should fund a one-stop service centre in my neighbourhood for low-income families, even if it means increased taxes. | Taxes    | Social Service    |
| 19   | housingbuild  | Municipalities should loosen zoning restrictions to encourage more housing construction.                       | My municipality should loosen zoning restrictions to encourage more housing construction in my neighbourhood.                        | None     | Housing           |
| 20   | trees         | Municipalities should put more resources into tree maintenance, even if it means increased taxes.              | My municipality should focus put more resources into tree maintenance in my neighbourhood, even if it means increased taxes.         | Taxes    | Parks and Culture |

Table 1: Survey Items (*continued*)

| Item | Variable     | General                                                                                                                                           | Proximate                                                                                                                                                              | Tradeoff | Domain            |
|------|--------------|---------------------------------------------------------------------------------------------------------------------------------------------------|------------------------------------------------------------------------------------------------------------------------------------------------------------------------|----------|-------------------|
| 21   | fire         | Municipalities should invest in new firefighters and fire equipment to improve service response times, even if it means increased taxes.          | My municipality should invest in new firefighters and fire equipment to improve service response times in my neighbourhood, even if it means increased taxes.          | Taxes    | Safety            |
| 22   | commerce     | Municipalities should simplify planning regulations to make it easier to build commercial buildings.                                              | My municipality should simplify planning regulations to make it easier to build commercial buildings in my neighbourhood.                                              | None     | Housing           |
| 23   | snow         | Municipalities should improve snow removal services, even if it means increased taxes.                                                            | My municipality should improve snow removal services in my neighbourhood, even if it means increased taxes.                                                            | Taxes    | Physical Services |
| 24   | devtcharges  | Municipalities should reduce fees charged to property developers, even if it reduced funds for municipal services.                                | My municipality should reduce fees charged to property developers in my neighbourhood, even if it reduced funds for municipal services.                                | Services | Housing           |
| 25   | antiracism   | Municipalities should change the names of streets or public facilities that commemorate historical figures who were prejudiced or racist.         | My municipality should change the names of streets or public facilities in my neighbourhood that commemorate historical figures who were prejudiced or racist.         | None     | Social Service    |
| 26   | womenshelter | Municipalities should support the operation of residential facilities for women escaping abusive relationships, even if it means increased taxes. | My municipality should support the operation of a residential facility in my neighbourhood for women escaping abusive relationships, even if it means increased taxes. | Taxes    | Social Service    |

Table 1: Survey Items (*continued*)

| Item | Variable    | General                                                                                                                          | Proximate                                                                                                                               | Tradeoff | Domain    |
|------|-------------|----------------------------------------------------------------------------------------------------------------------------------|-----------------------------------------------------------------------------------------------------------------------------------------|----------|-----------|
| 27   | coops       | Municipalities should encourage the development of more co-op housing.                                                           | My municipality should encourage the development of more co-op housing in my neighbourhood.                                             | None     | Housing   |
| 28   | trafficcam  | Municipalities should invest in red light cameras to improve traffic safety, even if it means increased taxes.                   | My municipality should invest in red light cameras to improve traffic safety in my neighbourhood, even if it means increased taxes.     | Taxes    | Safety    |
| 29   | proptheft   | Municipalities should give police more resources to prosecute property theft, even if it means increased taxes.                  | My municipality should give police more resources to prosecute property theft in my neighbourhood, even if it means increased taxes.    | Taxes    | Safety    |
| 30   | renters     | Municipalities should increase resources to support the legal rights and interests of renters, even if it means increased taxes. | My municipality should increase resources to support the legal rights and interests of renters, even if it means increased taxes.       | Taxes    | Housing   |
| 31   | securitycam | Municipalities should install more security cameras for safety, even if it means reduced privacy in public areas.                | My municipality should install more security cameras for safety in my neighbourhood, even if it means reduced privacy in public areas.  | Other    | Safety    |
| 32   | speed_up    | To reduce congestion, municipalities should increase speed limits, even if it means reduced safety for pedestrians.              | To reduce congestion, my municipality should increase speed limits in my neighbourhood, even if it means reduced safety for pedestrians | Other    | Transport |
| 33   | carshare    | Municipalities should promote car-sharing programs, even if it means reducing public parking spaces.                             | My municipality should promote car-sharing programs in my neighborhood, even if it means reducing public parking spaces.                | Other    | Transport |

Table 1: Survey Items (*continued*)

| Item | Variable        | General                                                                                                                       | Proximate                                                                                                                                          | Tradeoff | Domain            |
|------|-----------------|-------------------------------------------------------------------------------------------------------------------------------|----------------------------------------------------------------------------------------------------------------------------------------------------|----------|-------------------|
| 34   | affhousing      | Municipalities should support more affordable housing projects, even if it means increased housing density.                   | My municipality should support more affordable housing projects in my neighborhood, even if it means increased housing density.                    | Other    | Housing           |
| 35   | transit         | Municipalities should improve public transportation services, even if it means less spending on other municipal services.     | My municipality should improve public transportation services in my neighborhood, even if it means less spending on other municipal services.      | Services | Transport         |
| 36   | wildlife        | Municipalities should preserve natural areas, even if it means limiting new housing construction.                             | My municipality should preserve natural areas in my neighbourhood, even if it means limiting new housing construction.                             | Other    | Parks and Culture |
| 37   | evcharging      | Municipalities should install electric vehicle charging stations at libraries, arenas, parks, and other municipal facilities. | My municipality should install electric vehicle charging stations at libraries, arenas, parks, and other municipal facilities in my neighbourhood. | None     | Transport         |
| 38   | carfree         | Municipalities should introduce more car-free zones, even if it means making traffic routes longer for some drivers.          | My municipality should introduce more car-free zones in my neighborhood, even if it means making traffic routes longer for some drivers.           | Other    | Transport         |
| 39   | energyefficient | Municipalities should promote energy-efficient buildings, even if it means imposing stricter building regulations.            | My municipality should promote energy-efficient buildings in my neighborhood, even if it means imposing stricter building regulations.             | Other    | Housing           |

Table 1: Survey Items (*continued*)

| Item | Variable | General                                                                                                                              | Proximate                                                                                                                                                | Tradeoff | Domain    |
|------|----------|--------------------------------------------------------------------------------------------------------------------------------------|----------------------------------------------------------------------------------------------------------------------------------------------------------|----------|-----------|
| 40   | walkable | Municipalities should prioritize walkability in local planning and design, even if it means reducing on-street parking availability. | My municipality should prioritize walkability in local planning and design in my neighborhood, even if it means reducing on-street parking availability. | Other    | Transport |

## 2 OLS Models: Results and Power Analysis

### 2.1 OLS Model Results

In our pre-registered analysis plan, we proposed to test for the interaction between ideology and our geographic proximity treatment in individual OLS models for each of our 40 issues. Figure 1 summarizes these results, with the base ideology term in the left column, the base treatment term in the centre column, and the interaction term on the right column. As this is an interaction model, the ideology term can be interpreted as the relationship between ideology and policy preferences when the treatment variable is in the “general” rather than “proximate” framing, and the treatment term can be interpreted as the effect of the treatment variable among the most left-wing respondents in our survey (those who choose zero (0) on the 0-10 ideological self-placement scale).

We observe two important results in Figure 1. First, as we reported in the main text, many of the ideology coefficients are statistically significant in the “general” framing. Second, and more important, we observe that few of the interaction terms are statistically significant. However, we also observe that the sign of the interaction term is quite often the opposite of the ideology term, indicating the possibility of a “dampening” effect of the treatment variable on the relationship between ideology and policy preferences; indeed, the signs are the opposite in 80% of cases. This suggests that our individual OLS models may not be sufficiently well-powered to detect the ideological dampening effect, necessitating (as anticipated in our analysis plan) a pooled multilevel modeling approach.

### 2.2 Analysis: Statistical Power

In our analysis plan, we noted that even with a relatively large number of responses per issue, individual OLS models may not be sufficiently powered to detect an interaction between ideology and the treatment variable. Our preliminary power simulations indicated that an interaction term smaller than about  $-0.07$  would not be detectable with 80% power, and our estimated interaction term from the multilevel model reported in the main text ( $-0.05$ ) is indeed smaller than that value. Here, we provide additional evidence that our OLS models may be underpowered, and – as anticipated in our reregistered analysis plan – turn instead to results from the multilevel model.

To provide further evidence regarding the statistical power of our results, we extracted the overall coefficients for ideology, the treatment variable, and the interaction term from our multilevel model. We then used a bootstrap simulation procedure to investigate the proportion of instances in which our samples would be sufficiently large to detect these

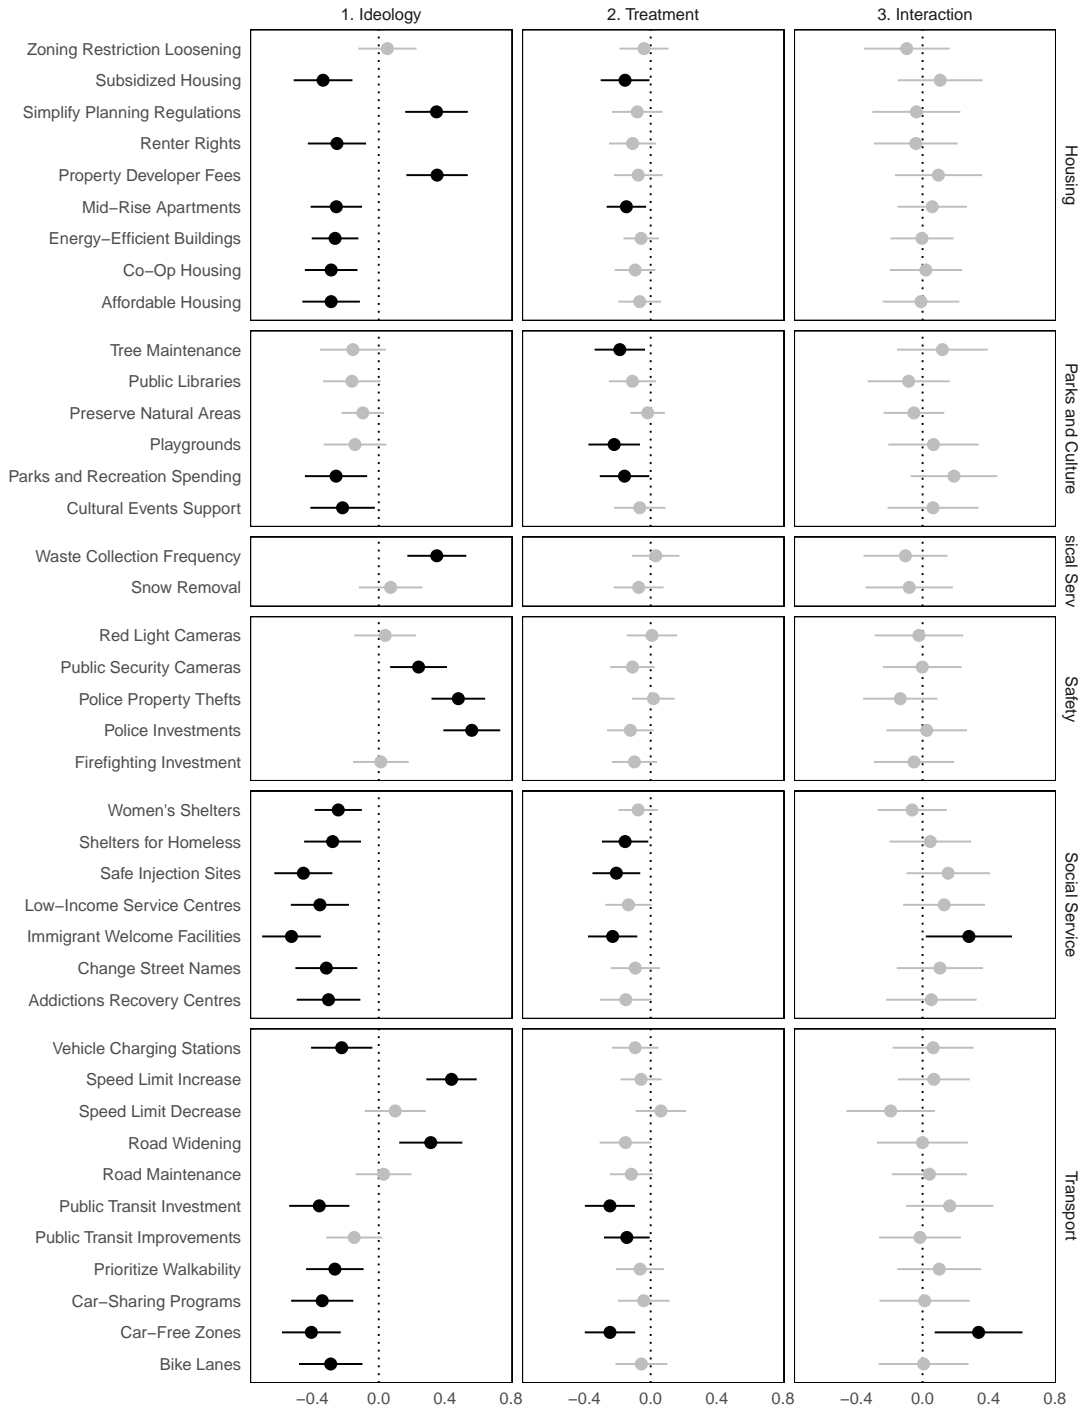

Figure 1: **OLS Models.** Coefficients from individual OLS models for each of the 40 issues. Note that each row reports coefficients from separate OLS models. Black coefficients are statistically significant ( $p < 0.05$ ). Issues are organized by policy domain.

coefficients in separate issue-specific OLS models. For each issue, we drew 100 distinct samples with replacement from our survey data, simulated an outcome variable with the observed ideology and treatment variables from the sample along with the observed coefficients from the multilevel model (adding error to the model to make the overall model fit similar to what we observe in our actual OLS models), and record the statistical significance of each coefficient in each of the 100 simulations. This simulation provides an answer to the following question: taking the coefficient estimates in the multilevel model as given, and taking as our simulation data the actual distribution of ideological self-placement and assignment to treatment in our survey responses, what proportion of the time is the model able to detect the coefficient estimates with statistically significant ( $p < 0.05$ ) precision?

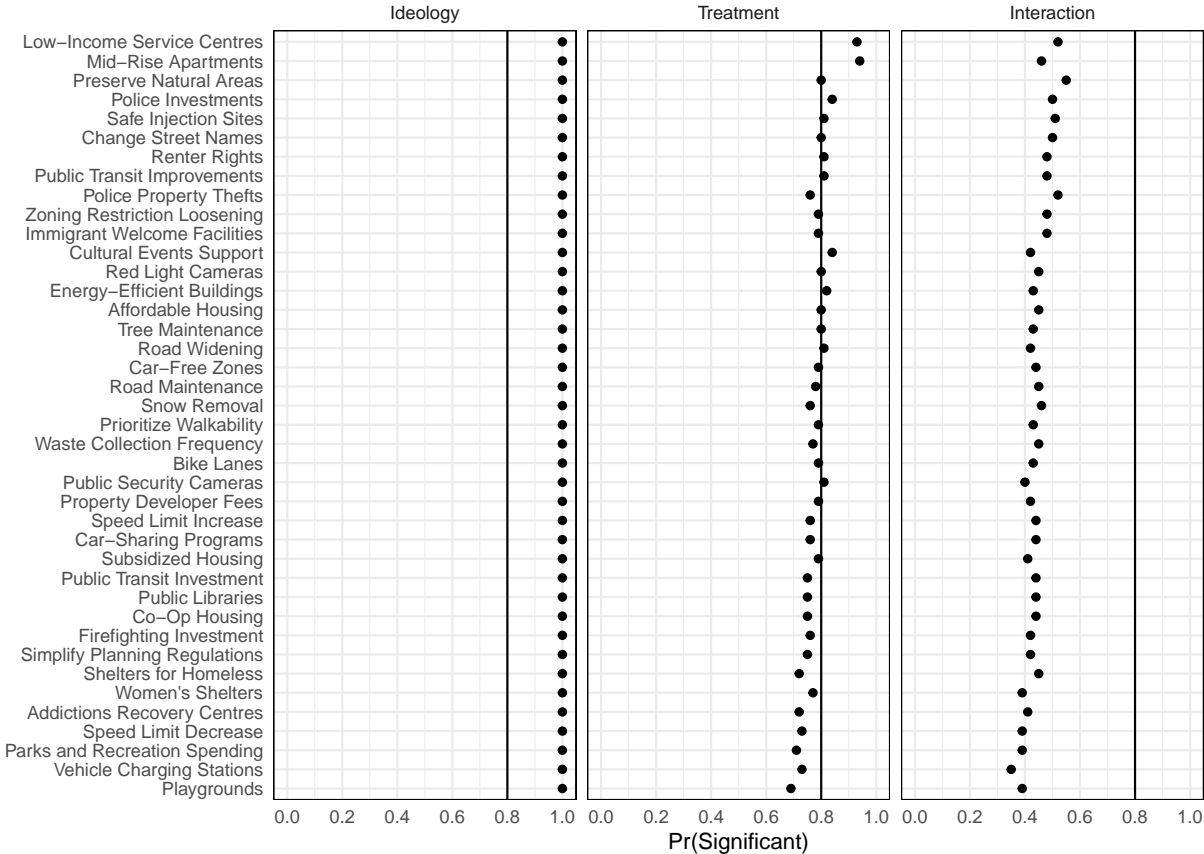

Figure 2: **Power Analysis, OLS Models.** Power tests from bootstrap simulations using observed coefficients in multilevel model and bootstrap samples of survey data. Circles report the proportion of bootstrap samples in which the measured coefficient is statistically significant ( $p < 0.05$ ).

The results in Figure 2 indicate that our data are sufficiently well-powered to detect

both of the “base” effects in the model (ideology and treatment), but are not sufficiently powered to consistently detect the interaction term. In fact, these results are very similar to those we reported in our pre-analysis plan. For this reason, in keeping with both the topic sampling approach in general (Clifford, Leeper and Rainey, 2024; Clifford and Rainey, 2024) and our pre-registered analysis plan in particular, we rely instead on the partial pooling approach provided by the multilevel model.

### 3 Desirability and Effect Heterogeneity

In our analysis plan, we included three exploratory hypotheses related to the “desirability” (and more specifically variation in the desirability) of our policy proposals:

- H3: The dampening effect of local framing on ideology (i.e. the size of the interaction term) varies across issue statements. This variation across issue statements is significantly associated with the allocational “goodness” or “badness” of an issue statement.
- H4: The strength of the treatment effect will be larger when proposals are less desirable and smaller when proposals are more desirable. In other words, the relationship between desirability and the treatment effect will be negative.
- H5: For policy proposals with low desirability, the treatment effect will be strongest among individuals on the ideological left. For policy proposals with high desirability, the treatment effect will be strongest among individuals on the right.

To measure desirability, we pulled 500 survey respondents from the main study, each of whom answered ten questions about allocational desirability rather than the issue position questions. This generated about 100 responses for each question, from which we calculated an average “desirability” score for each of the 40 items. Our question wording for this item is as follows:

- We would like to understand what kinds of municipal investments are desirable for a local neighbourhood, and which kinds of investments are more challenging for local neighbourhoods. For each of these proposals, please tell us if you think they are **desirable or undesirable** for a local neighbourhood. Remember, **we do not need to know if you personally support the proposal**. Instead, we want to know if you think these investments tend to be beneficial for the people who live near where they are located.

We then constructed a simple weighted mean estimate of desirability for each of the 40 items and use this mean estimate in our heterogeneity test. Figure 3 summarizes the results of this analysis. We find no support for our hypothesis: the ideological dampening effect is not stronger for less desirable policy proposals than for more desirable proposals.

On further inspection, we worried that this null relationship may originate in our desirability measure; we found, for instance, that despite our preamble, responses to the

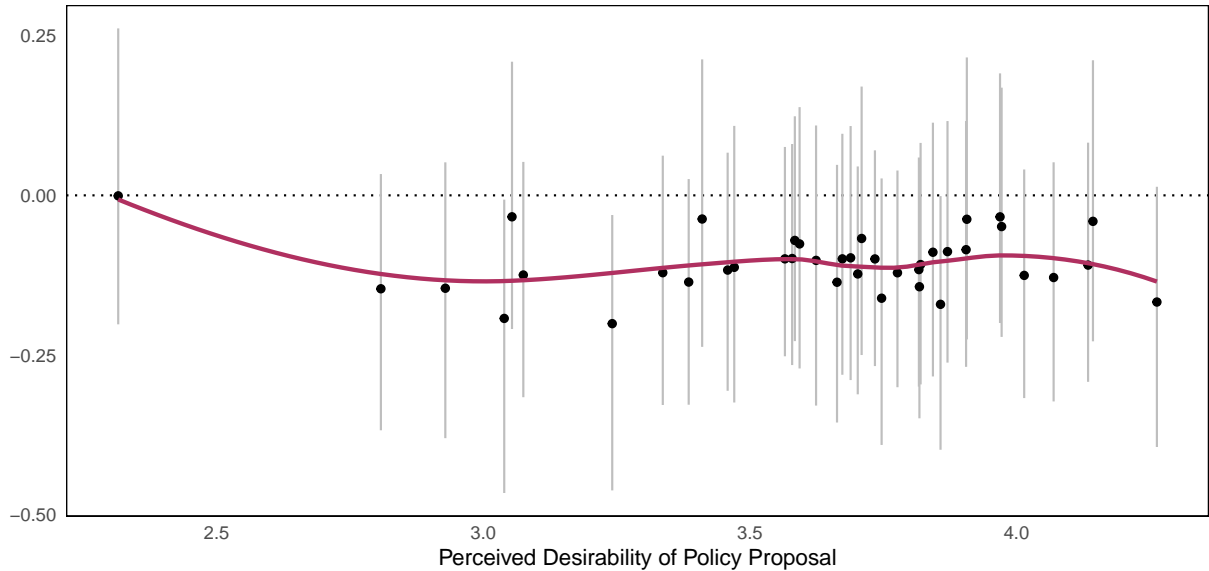

Figure 3: **Effect Heterogeneity by Policy Desirability.** Relationship between the perceived desirability of the policy statement (horizontal axis) and the interaction term from the multilevel model (vertical axis).

desirability question were strongly related to respondents' ideology, which severely compromises the utility of the variable for our purposes. We therefore carried out an alternative coding strategy: three members of the research team independently coded all 40 policy items as "desirable", "neutral", or "undesirable." Nearly all coding decisions were unanimous, and disagreements were resolved by the majority coding decision.

We summarize the results of this alternative approach in Figure 4, which organizes policy statements into our three coding categories. Here, too, we find no evidence to support the hypothesis that the interaction term is especially large among the undesirable policy statements. We therefore conclude that the results in Figure 3 are not merely due to measurement issues.

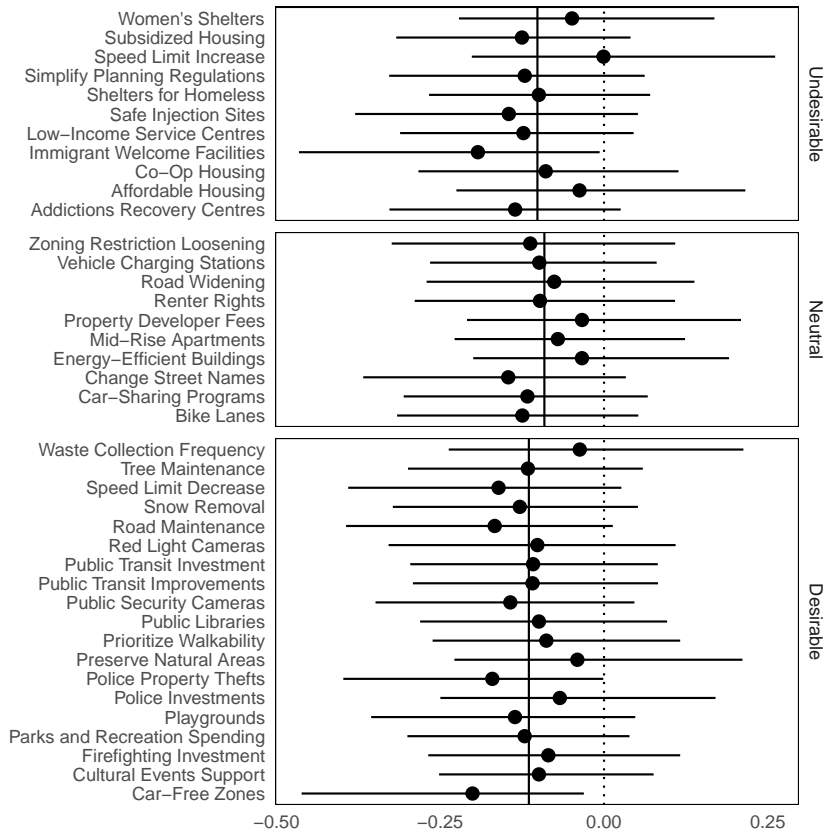

Figure 4: **Effect Heterogeneity by Policy Desirability.** Interaction term from multilevel model, grouped by desirability of policy statement (drawn from hand coding).

## 4 Meta-Analysis Results

In the main text, we report results of a random-effects meta-analysis of the relationship between ideology and policy attitudes on the 40 issues in our study. We find a value of 0.62 for this overall relationship, with strong evidence for effect variability across issues (77% of the variance is across-issue; a Q-test for heterogeneity is statistically significant at  $p < 0.001$ ). In the Table below, we report meta-analysis results for each of the six policy domains in our study. We find evidence that, on average, ideology is related to policy attitudes in all of the policy domains in the study. However, this relationship varies in magnitude across domains, from a low of 0.27 in our residual “other” category to a high of 0.95 in the case of more redistributively-oriented social services questions.

| Domain            | Coefficient | Lower | Upper |
|-------------------|-------------|-------|-------|
| Other             | 0.27        | 0.03  | 0.51  |
| Parks and Culture | 0.35        | 0.23  | 0.48  |
| Safety            | 0.56        | 0.09  | 1.03  |
| Housing           | 0.62        | 0.46  | 0.78  |
| Transport         | 0.64        | 0.45  | 0.83  |
| Social Service    | 0.95        | 0.72  | 1.17  |

We can also apply a meta-analytic approach to the OLS results discussed in SM2 above. While each individual experiment is underpowered, we find strong evidence of a negative interaction term in a meta-analysis of all 40 policies drawn from the OLS models: this random-effects meta-analysis suggests a statistically significant overall interaction term of -0.09 (95% CI = -0.16, -0.01,  $p < 0.05$ ). These results are very similar to the overall interaction term drawn from the multilevel model and reported in Main Text Figure 2.

## 5 Multilevel Model: Additional Detail and Results

### 5.1 Model Specification

While we provide notation for our multilevel model in the main text, we provide our model code in R, which may be more intuitive for those who are familiar with multilevel model conventions in many R packages. Notice that this model allows our variables of interest (ideology, treatment, and the interaction between the two) *along with* our pre-treatment covariates to vary by policy issue. Notice also that we include varying intercepts for each survey respondent to account for repeated observations from each survey respondent in the data. Early testing indicated that model convergence was aided by additional iterations, so we fit 8,000 iterations for each of the four chains in the model.

---

```
stan_glmer(outcome ~ ideol*treat + age + woman + edu + suburban +  
  homeown + logpop +  
  (1 + ideol*treat + age + woman + edu + suburban + homeown + logpop  
    | issue_id) +  
  (1 | individual_id),  
  data=df.recode, cores=4, family=binomial(link="logit"),  
  warmup=2000, iter=8000)
```

---

### 5.2 Multilevel Model: Full Table

The table below provides the full results for the multilevel model in the main text. Note that issue-specific coefficients must be added to the general coefficients; for example, the relationship between ideology and issue position for the subsidized housing question is 0.606 (General) + 0.065 (Issue-Specific), or 0.671.

---

| label   | variable           | Median | SD    | Lower  | Upper  |
|---------|--------------------|--------|-------|--------|--------|
| General | Ideology           | 0.606  | 0.057 | 0.495  | 0.717  |
| General | Treatment          | 0.158  | 0.036 | 0.087  | 0.229  |
| General | Age                | 0.122  | 0.068 | -0.013 | 0.254  |
| General | Woman              | -0.004 | 0.022 | -0.046 | 0.038  |
| General | Education          | -0.149 | 0.032 | -0.211 | -0.087 |
| General | Place: Suburban    | 0.067  | 0.023 | 0.023  | 0.112  |
| General | Home Owner (Own)   | 0.102  | 0.027 | 0.049  | 0.154  |
| General | Home Owner (Other) | 0.026  | 0.031 | -0.033 | 0.088  |

---

|                             |                    |        |       |        |        |
|-----------------------------|--------------------|--------|-------|--------|--------|
| General                     | Population         | -0.012 | 0.047 | -0.104 | 0.078  |
| General                     | Ideology*Treatment | -0.105 | 0.041 | -0.185 | -0.025 |
| Subsidized Housing          | Ideology           | 0.065  | 0.119 | -0.169 | 0.298  |
| Subsidized Housing          | Treatment          | 0.133  | 0.070 | -0.001 | 0.277  |
| Subsidized Housing          | Age                | 0.082  | 0.124 | -0.158 | 0.331  |
| Subsidized Housing          | Woman              | 0.009  | 0.050 | -0.090 | 0.105  |
| Subsidized Housing          | Education          | 0.020  | 0.076 | -0.124 | 0.174  |
| Subsidized Housing          | Place: Suburban    | 0.066  | 0.049 | -0.032 | 0.160  |
| Subsidized Housing          | Home Owner (Own)   | 0.234  | 0.058 | 0.122  | 0.353  |
| Subsidized Housing          | Home Owner (Other) | 0.049  | 0.073 | -0.093 | 0.194  |
| Subsidized Housing          | Population         | -0.002 | 0.094 | -0.186 | 0.192  |
| Subsidized Housing          | Ideology*Treatment | -0.018 | 0.083 | -0.204 | 0.132  |
| Addictions Recovery Centres | Ideology           | -0.016 | 0.120 | -0.247 | 0.219  |
| Addictions Recovery Centres | Treatment          | 0.154  | 0.070 | 0.023  | 0.300  |
| Addictions Recovery Centres | Age                | 0.242  | 0.122 | 0.001  | 0.483  |
| Addictions Recovery Centres | Woman              | 0.053  | 0.049 | -0.043 | 0.150  |
| Addictions Recovery Centres | Education          | 0.008  | 0.076 | -0.135 | 0.166  |
| Addictions Recovery Centres | Place: Suburban    | 0.099  | 0.049 | 0.004  | 0.196  |
| Addictions Recovery Centres | Home Owner (Own)   | 0.162  | 0.059 | 0.048  | 0.277  |
| Addictions Recovery Centres | Home Owner (Other) | -0.022 | 0.072 | -0.163 | 0.118  |
| Addictions Recovery Centres | Population         | 0.008  | 0.093 | -0.164 | 0.210  |
| Addictions Recovery Centres | Ideology*Treatment | -0.029 | 0.082 | -0.212 | 0.117  |
| Public Transit Investment   | Ideology           | 0.049  | 0.124 | -0.194 | 0.295  |
| Public Transit Investment   | Treatment          | 0.202  | 0.073 | 0.061  | 0.349  |
| Public Transit Investment   | Age                | 0.207  | 0.125 | -0.032 | 0.455  |
| Public Transit Investment   | Woman              | 0.078  | 0.051 | -0.020 | 0.178  |
| Public Transit Investment   | Education          | -0.139 | 0.078 | -0.300 | 0.006  |
| Public Transit Investment   | Place: Suburban    | -0.014 | 0.053 | -0.124 | 0.086  |
| Public Transit Investment   | Home Owner (Own)   | 0.061  | 0.060 | -0.055 | 0.180  |
| Public Transit Investment   | Home Owner (Other) | -0.021 | 0.076 | -0.169 | 0.130  |
| Public Transit Investment   | Population         | -0.174 | 0.112 | -0.429 | 0.006  |
| Public Transit Investment   | Ideology*Treatment | -0.004 | 0.088 | -0.180 | 0.178  |
| Police Investments          | Ideology           | 0.467  | 0.121 | 0.232  | 0.707  |
| Police Investments          | Treatment          | -0.292 | 0.077 | -0.455 | -0.151 |

|                               |                    |        |       |        |        |
|-------------------------------|--------------------|--------|-------|--------|--------|
| Police Investments            | Age                | 0.230  | 0.127 | -0.016 | 0.479  |
| Police Investments            | Woman              | 0.063  | 0.052 | -0.038 | 0.167  |
| Police Investments            | Education          | 0.058  | 0.079 | -0.090 | 0.223  |
| Police Investments            | Place: Suburban    | -0.068 | 0.053 | -0.175 | 0.032  |
| Police Investments            | Home Owner (Own)   | -0.109 | 0.060 | -0.226 | 0.008  |
| Police Investments            | Home Owner (Other) | -0.046 | 0.077 | -0.199 | 0.103  |
| Police Investments            | Population         | 0.111  | 0.108 | -0.086 | 0.340  |
| Police Investments            | Ideology*Treatment | 0.036  | 0.099 | -0.133 | 0.268  |
| Parks and Recreation Spending | Ideology           | -0.115 | 0.118 | -0.347 | 0.118  |
| Parks and Recreation Spending | Treatment          | 0.045  | 0.068 | -0.090 | 0.182  |
| Parks and Recreation Spending | Age                | 0.057  | 0.120 | -0.177 | 0.292  |
| Parks and Recreation Spending | Woman              | 0.059  | 0.050 | -0.038 | 0.158  |
| Parks and Recreation Spending | Education          | -0.068 | 0.074 | -0.223 | 0.072  |
| Parks and Recreation Spending | Place: Suburban    | 0.041  | 0.050 | -0.054 | 0.140  |
| Parks and Recreation Spending | Home Owner (Own)   | -0.012 | 0.057 | -0.126 | 0.098  |
| Parks and Recreation Spending | Home Owner (Other) | 0.044  | 0.072 | -0.096 | 0.188  |
| Parks and Recreation Spending | Population         | -0.008 | 0.093 | -0.200 | 0.172  |
| Parks and Recreation Spending | Ideology*Treatment | -0.015 | 0.079 | -0.186 | 0.137  |
| Waste Collection Frequency    | Ideology           | -0.126 | 0.126 | -0.372 | 0.123  |
| Waste Collection Frequency    | Treatment          | -0.226 | 0.078 | -0.387 | -0.078 |
| Waste Collection Frequency    | Age                | -0.919 | 0.125 | -1.166 | -0.679 |
| Waste Collection Frequency    | Woman              | 0.022  | 0.055 | -0.085 | 0.133  |
| Waste Collection Frequency    | Education          | 0.107  | 0.082 | -0.057 | 0.265  |
| Waste Collection Frequency    | Place: Suburban    | -0.222 | 0.054 | -0.330 | -0.117 |
| Waste Collection Frequency    | Home Owner (Own)   | -0.260 | 0.060 | -0.378 | -0.144 |
| Waste Collection Frequency    | Home Owner (Other) | 0.067  | 0.085 | -0.104 | 0.230  |
| Waste Collection Frequency    | Population         | 0.059  | 0.112 | -0.157 | 0.292  |
| Waste Collection Frequency    | Ideology*Treatment | 0.066  | 0.109 | -0.122 | 0.314  |
| Cultural Events Support       | Ideology           | -0.056 | 0.118 | -0.289 | 0.174  |
| Cultural Events Support       | Treatment          | -0.025 | 0.067 | -0.163 | 0.102  |
| Cultural Events Support       | Age                | 0.212  | 0.121 | -0.024 | 0.453  |
| Cultural Events Support       | Woman              | 0.043  | 0.048 | -0.051 | 0.140  |
| Cultural Events Support       | Education          | -0.040 | 0.075 | -0.197 | 0.098  |
| Cultural Events Support       | Place: Suburban    | 0.042  | 0.049 | -0.052 | 0.140  |

|                         |                    |        |       |        |        |
|-------------------------|--------------------|--------|-------|--------|--------|
| Cultural Events Support | Home Owner (Own)   | 0.003  | 0.057 | -0.111 | 0.114  |
| Cultural Events Support | Home Owner (Other) | 0.015  | 0.072 | -0.123 | 0.160  |
| Cultural Events Support | Population         | 0.059  | 0.092 | -0.103 | 0.261  |
| Cultural Events Support | Ideology*Treatment | 0.006  | 0.075 | -0.133 | 0.170  |
| Shelters for Homeless   | Ideology           | 0.146  | 0.118 | -0.082 | 0.378  |
| Shelters for Homeless   | Treatment          | 0.152  | 0.068 | 0.021  | 0.290  |
| Shelters for Homeless   | Age                | -0.081 | 0.122 | -0.318 | 0.161  |
| Shelters for Homeless   | Woman              | -0.051 | 0.050 | -0.152 | 0.045  |
| Shelters for Homeless   | Education          | -0.046 | 0.073 | -0.193 | 0.099  |
| Shelters for Homeless   | Place: Suburban    | 0.062  | 0.048 | -0.033 | 0.158  |
| Shelters for Homeless   | Home Owner (Own)   | 0.114  | 0.058 | 0.002  | 0.228  |
| Shelters for Homeless   | Home Owner (Other) | -0.002 | 0.070 | -0.141 | 0.136  |
| Shelters for Homeless   | Population         | -0.101 | 0.093 | -0.301 | 0.066  |
| Shelters for Homeless   | Ideology*Treatment | 0.005  | 0.077 | -0.151 | 0.165  |
| Playgrounds             | Ideology           | -0.322 | 0.123 | -0.565 | -0.082 |
| Playgrounds             | Treatment          | 0.203  | 0.076 | 0.066  | 0.365  |
| Playgrounds             | Age                | 0.330  | 0.126 | 0.083  | 0.578  |
| Playgrounds             | Woman              | 0.096  | 0.052 | -0.004 | 0.198  |
| Playgrounds             | Education          | -0.055 | 0.080 | -0.208 | 0.110  |
| Playgrounds             | Place: Suburban    | 0.016  | 0.052 | -0.086 | 0.120  |
| Playgrounds             | Home Owner (Own)   | 0.010  | 0.059 | -0.104 | 0.126  |
| Playgrounds             | Home Owner (Other) | -0.007 | 0.079 | -0.157 | 0.152  |
| Playgrounds             | Population         | -0.033 | 0.102 | -0.239 | 0.171  |
| Playgrounds             | Ideology*Treatment | -0.029 | 0.095 | -0.241 | 0.141  |
| Public Libraries        | Ideology           | -0.126 | 0.117 | -0.364 | 0.102  |
| Public Libraries        | Treatment          | 0.192  | 0.071 | 0.054  | 0.332  |
| Public Libraries        | Age                | 0.165  | 0.123 | -0.075 | 0.406  |
| Public Libraries        | Woman              | 0.057  | 0.049 | -0.039 | 0.154  |
| Public Libraries        | Education          | -0.210 | 0.087 | -0.405 | -0.065 |
| Public Libraries        | Place: Suburban    | 0.027  | 0.050 | -0.072 | 0.126  |
| Public Libraries        | Home Owner (Own)   | 0.013  | 0.058 | -0.099 | 0.127  |
| Public Libraries        | Home Owner (Other) | -0.017 | 0.074 | -0.160 | 0.132  |
| Public Libraries        | Population         | -0.110 | 0.101 | -0.323 | 0.077  |
| Public Libraries        | Ideology*Treatment | 0.006  | 0.087 | -0.162 | 0.193  |

|                      |                    |        |       |        |        |
|----------------------|--------------------|--------|-------|--------|--------|
| Mid-Rise Apartments  | Ideology           | -0.176 | 0.117 | -0.406 | 0.053  |
| Mid-Rise Apartments  | Treatment          | 0.175  | 0.070 | 0.033  | 0.308  |
| Mid-Rise Apartments  | Age                | -0.141 | 0.119 | -0.372 | 0.095  |
| Mid-Rise Apartments  | Woman              | 0.015  | 0.048 | -0.081 | 0.111  |
| Mid-Rise Apartments  | Education          | 0.028  | 0.074 | -0.114 | 0.179  |
| Mid-Rise Apartments  | Place: Suburban    | 0.060  | 0.048 | -0.035 | 0.155  |
| Mid-Rise Apartments  | Home Owner (Own)   | 0.170  | 0.057 | 0.057  | 0.281  |
| Mid-Rise Apartments  | Home Owner (Other) | 0.112  | 0.071 | -0.023 | 0.257  |
| Mid-Rise Apartments  | Population         | -0.018 | 0.093 | -0.201 | 0.172  |
| Mid-Rise Apartments  | Ideology*Treatment | 0.033  | 0.083 | -0.111 | 0.223  |
| Road Maintenance     | Ideology           | -0.275 | 0.125 | -0.521 | -0.034 |
| Road Maintenance     | Treatment          | -0.246 | 0.076 | -0.392 | -0.092 |
| Road Maintenance     | Age                | 0.248  | 0.124 | 0.006  | 0.495  |
| Road Maintenance     | Woman              | 0.006  | 0.051 | -0.094 | 0.104  |
| Road Maintenance     | Education          | 0.015  | 0.081 | -0.155 | 0.163  |
| Road Maintenance     | Place: Suburban    | -0.117 | 0.051 | -0.221 | -0.017 |
| Road Maintenance     | Home Owner (Own)   | -0.122 | 0.062 | -0.241 | 0.000  |
| Road Maintenance     | Home Owner (Other) | 0.015  | 0.079 | -0.132 | 0.177  |
| Road Maintenance     | Population         | 0.078  | 0.103 | -0.127 | 0.283  |
| Road Maintenance     | Ideology*Treatment | -0.060 | 0.098 | -0.281 | 0.110  |
| Road Widening        | Ideology           | 0.170  | 0.125 | -0.077 | 0.413  |
| Road Widening        | Treatment          | -0.418 | 0.075 | -0.578 | -0.278 |
| Road Widening        | Age                | -0.513 | 0.127 | -0.766 | -0.266 |
| Road Widening        | Woman              | -0.076 | 0.052 | -0.177 | 0.027  |
| Road Widening        | Education          | 0.123  | 0.081 | -0.046 | 0.275  |
| Road Widening        | Place: Suburban    | -0.135 | 0.052 | -0.237 | -0.033 |
| Road Widening        | Home Owner (Own)   | -0.139 | 0.061 | -0.258 | -0.019 |
| Road Widening        | Home Owner (Other) | 0.103  | 0.078 | -0.046 | 0.256  |
| Road Widening        | Population         | 0.170  | 0.108 | -0.018 | 0.407  |
| Road Widening        | Ideology*Treatment | 0.027  | 0.097 | -0.156 | 0.237  |
| Safe Injection Sites | Ideology           | 0.456  | 0.123 | 0.223  | 0.707  |
| Safe Injection Sites | Treatment          | 0.103  | 0.078 | -0.040 | 0.267  |
| Safe Injection Sites | Age                | 0.497  | 0.125 | 0.258  | 0.745  |
| Safe Injection Sites | Woman              | 0.015  | 0.052 | -0.086 | 0.117  |

|                              |                    |        |       |        |        |
|------------------------------|--------------------|--------|-------|--------|--------|
| Safe Injection Sites         | Education          | -0.049 | 0.085 | -0.201 | 0.134  |
| Safe Injection Sites         | Place: Suburban    | 0.071  | 0.052 | -0.031 | 0.174  |
| Safe Injection Sites         | Home Owner (Own)   | 0.002  | 0.060 | -0.116 | 0.120  |
| Safe Injection Sites         | Home Owner (Other) | -0.195 | 0.081 | -0.357 | -0.041 |
| Safe Injection Sites         | Population         | -0.117 | 0.109 | -0.354 | 0.075  |
| Safe Injection Sites         | Ideology*Treatment | -0.039 | 0.103 | -0.265 | 0.147  |
| Speed Limit Decrease         | Ideology           | -0.374 | 0.125 | -0.621 | -0.131 |
| Speed Limit Decrease         | Treatment          | -0.139 | 0.077 | -0.285 | 0.018  |
| Speed Limit Decrease         | Age                | 0.306  | 0.124 | 0.067  | 0.552  |
| Speed Limit Decrease         | Woman              | 0.077  | 0.051 | -0.022 | 0.178  |
| Speed Limit Decrease         | Education          | 0.122  | 0.090 | -0.031 | 0.323  |
| Speed Limit Decrease         | Place: Suburban    | -0.149 | 0.052 | -0.255 | -0.049 |
| Speed Limit Decrease         | Home Owner (Own)   | -0.250 | 0.060 | -0.368 | -0.135 |
| Speed Limit Decrease         | Home Owner (Other) | -0.132 | 0.077 | -0.285 | 0.015  |
| Speed Limit Decrease         | Population         | 0.027  | 0.105 | -0.195 | 0.224  |
| Speed Limit Decrease         | Ideology*Treatment | -0.054 | 0.100 | -0.279 | 0.121  |
| Bike Lanes                   | Ideology           | 0.162  | 0.120 | -0.072 | 0.397  |
| Bike Lanes                   | Treatment          | -0.035 | 0.071 | -0.174 | 0.109  |
| Bike Lanes                   | Age                | 0.465  | 0.125 | 0.224  | 0.711  |
| Bike Lanes                   | Woman              | 0.041  | 0.050 | -0.056 | 0.139  |
| Bike Lanes                   | Education          | -0.176 | 0.090 | -0.380 | -0.028 |
| Bike Lanes                   | Place: Suburban    | 0.044  | 0.050 | -0.053 | 0.145  |
| Bike Lanes                   | Home Owner (Own)   | -0.036 | 0.059 | -0.153 | 0.079  |
| Bike Lanes                   | Home Owner (Other) | -0.058 | 0.073 | -0.202 | 0.087  |
| Bike Lanes                   | Population         | 0.044  | 0.101 | -0.137 | 0.270  |
| Bike Lanes                   | Ideology*Treatment | -0.019 | 0.086 | -0.203 | 0.147  |
| Immigrant Welcome Facilities | Ideology           | 0.378  | 0.125 | 0.138  | 0.630  |
| Immigrant Welcome Facilities | Treatment          | 0.141  | 0.083 | -0.005 | 0.321  |
| Immigrant Welcome Facilities | Age                | 0.160  | 0.126 | -0.089 | 0.407  |
| Immigrant Welcome Facilities | Woman              | 0.019  | 0.052 | -0.083 | 0.120  |
| Immigrant Welcome Facilities | Education          | -0.205 | 0.088 | -0.397 | -0.053 |
| Immigrant Welcome Facilities | Place: Suburban    | 0.043  | 0.051 | -0.058 | 0.143  |
| Immigrant Welcome Facilities | Home Owner (Own)   | 0.093  | 0.059 | -0.021 | 0.211  |
| Immigrant Welcome Facilities | Home Owner (Other) | -0.121 | 0.077 | -0.275 | 0.025  |

|                              |                    |        |       |        |        |
|------------------------------|--------------------|--------|-------|--------|--------|
| Immigrant Welcome Facilities | Population         | -0.160 | 0.114 | -0.406 | 0.040  |
| Immigrant Welcome Facilities | Ideology*Treatment | -0.084 | 0.113 | -0.355 | 0.087  |
| Low-Income Service Centres   | Ideology           | 0.056  | 0.118 | -0.176 | 0.290  |
| Low-Income Service Centres   | Treatment          | 0.091  | 0.070 | -0.044 | 0.231  |
| Low-Income Service Centres   | Age                | -0.026 | 0.126 | -0.278 | 0.216  |
| Low-Income Service Centres   | Woman              | 0.031  | 0.050 | -0.065 | 0.130  |
| Low-Income Service Centres   | Education          | 0.021  | 0.076 | -0.131 | 0.171  |
| Low-Income Service Centres   | Place: Suburban    | 0.094  | 0.050 | -0.001 | 0.195  |
| Low-Income Service Centres   | Home Owner (Own)   | 0.227  | 0.059 | 0.113  | 0.343  |
| Low-Income Service Centres   | Home Owner (Other) | 0.046  | 0.073 | -0.101 | 0.189  |
| Low-Income Service Centres   | Population         | 0.029  | 0.097 | -0.148 | 0.235  |
| Low-Income Service Centres   | Ideology*Treatment | -0.017 | 0.083 | -0.201 | 0.140  |
| Zoning Restriction Loosening | Ideology           | -0.372 | 0.124 | -0.623 | -0.135 |
| Zoning Restriction Loosening | Treatment          | -0.292 | 0.079 | -0.453 | -0.140 |
| Zoning Restriction Loosening | Age                | -0.071 | 0.129 | -0.321 | 0.183  |
| Zoning Restriction Loosening | Woman              | -0.110 | 0.052 | -0.215 | -0.010 |
| Zoning Restriction Loosening | Education          | 0.106  | 0.080 | -0.047 | 0.267  |
| Zoning Restriction Loosening | Place: Suburban    | -0.220 | 0.053 | -0.328 | -0.117 |
| Zoning Restriction Loosening | Home Owner (Own)   | -0.372 | 0.063 | -0.497 | -0.248 |
| Zoning Restriction Loosening | Home Owner (Other) | -0.102 | 0.077 | -0.254 | 0.050  |
| Zoning Restriction Loosening | Population         | 0.006  | 0.112 | -0.233 | 0.209  |
| Zoning Restriction Loosening | Ideology*Treatment | -0.007 | 0.102 | -0.210 | 0.204  |
| Tree Maintenance             | Ideology           | -0.240 | 0.122 | -0.480 | 0.001  |
| Tree Maintenance             | Treatment          | 0.135  | 0.069 | 0.004  | 0.275  |
| Tree Maintenance             | Age                | 0.080  | 0.125 | -0.168 | 0.323  |
| Tree Maintenance             | Woman              | 0.084  | 0.050 | -0.013 | 0.185  |
| Tree Maintenance             | Education          | -0.025 | 0.076 | -0.171 | 0.130  |
| Tree Maintenance             | Place: Suburban    | -0.033 | 0.051 | -0.134 | 0.066  |
| Tree Maintenance             | Home Owner (Own)   | -0.045 | 0.059 | -0.161 | 0.071  |
| Tree Maintenance             | Home Owner (Other) | -0.109 | 0.074 | -0.261 | 0.031  |
| Tree Maintenance             | Population         | -0.069 | 0.097 | -0.280 | 0.111  |
| Tree Maintenance             | Ideology*Treatment | -0.010 | 0.082 | -0.184 | 0.154  |
| Firefighting Investment      | Ideology           | -0.405 | 0.124 | -0.652 | -0.166 |
| Firefighting Investment      | Treatment          | 0.137  | 0.073 | -0.010 | 0.280  |

|                               |                    |        |       |        |        |
|-------------------------------|--------------------|--------|-------|--------|--------|
| Firefighting Investment       | Age                | -0.206 | 0.123 | -0.447 | 0.033  |
| Firefighting Investment       | Woman              | -0.007 | 0.051 | -0.106 | 0.093  |
| Firefighting Investment       | Education          | 0.106  | 0.086 | -0.042 | 0.298  |
| Firefighting Investment       | Place: Suburban    | 0.014  | 0.052 | -0.084 | 0.118  |
| Firefighting Investment       | Home Owner (Own)   | -0.054 | 0.061 | -0.174 | 0.062  |
| Firefighting Investment       | Home Owner (Other) | -0.064 | 0.080 | -0.229 | 0.083  |
| Firefighting Investment       | Population         | -0.036 | 0.099 | -0.241 | 0.152  |
| Firefighting Investment       | Ideology*Treatment | 0.019  | 0.091 | -0.154 | 0.215  |
| Simplify Planning Regulations | Ideology           | 0.109  | 0.124 | -0.135 | 0.353  |
| Simplify Planning Regulations | Treatment          | -0.273 | 0.074 | -0.419 | -0.126 |
| Simplify Planning Regulations | Age                | -0.310 | 0.128 | -0.562 | -0.057 |
| Simplify Planning Regulations | Woman              | -0.132 | 0.051 | -0.233 | -0.034 |
| Simplify Planning Regulations | Education          | 0.149  | 0.082 | 0.002  | 0.323  |
| Simplify Planning Regulations | Place: Suburban    | -0.069 | 0.053 | -0.169 | 0.037  |
| Simplify Planning Regulations | Home Owner (Own)   | -0.217 | 0.060 | -0.336 | -0.099 |
| Simplify Planning Regulations | Home Owner (Other) | -0.101 | 0.080 | -0.264 | 0.049  |
| Simplify Planning Regulations | Population         | 0.071  | 0.101 | -0.123 | 0.278  |
| Simplify Planning Regulations | Ideology*Treatment | -0.014 | 0.092 | -0.214 | 0.159  |
| Snow Removal                  | Ideology           | -0.380 | 0.125 | -0.631 | -0.143 |
| Snow Removal                  | Treatment          | 0.135  | 0.072 | -0.007 | 0.277  |
| Snow Removal                  | Age                | 0.086  | 0.123 | -0.157 | 0.326  |
| Snow Removal                  | Woman              | -0.025 | 0.051 | -0.127 | 0.073  |
| Snow Removal                  | Education          | -0.072 | 0.081 | -0.247 | 0.073  |
| Snow Removal                  | Place: Suburban    | 0.050  | 0.051 | -0.050 | 0.152  |
| Snow Removal                  | Home Owner (Own)   | 0.112  | 0.060 | -0.005 | 0.232  |
| Snow Removal                  | Home Owner (Other) | 0.044  | 0.077 | -0.105 | 0.198  |
| Snow Removal                  | Population         | -0.050 | 0.100 | -0.261 | 0.140  |
| Snow Removal                  | Ideology*Treatment | -0.023 | 0.088 | -0.211 | 0.147  |
| Property Developer Fees       | Ideology           | 0.230  | 0.123 | -0.010 | 0.472  |
| Property Developer Fees       | Treatment          | -0.233 | 0.077 | -0.397 | -0.096 |
| Property Developer Fees       | Age                | -0.766 | 0.125 | -1.010 | -0.519 |
| Property Developer Fees       | Woman              | -0.168 | 0.052 | -0.271 | -0.068 |
| Property Developer Fees       | Education          | 0.070  | 0.081 | -0.094 | 0.226  |
| Property Developer Fees       | Place: Suburban    | -0.103 | 0.052 | -0.205 | 0.003  |

|                         |                    |        |       |        |        |
|-------------------------|--------------------|--------|-------|--------|--------|
| Property Developer Fees | Home Owner (Own)   | -0.132 | 0.061 | -0.254 | -0.012 |
| Property Developer Fees | Home Owner (Other) | 0.140  | 0.079 | -0.007 | 0.303  |
| Property Developer Fees | Population         | -0.008 | 0.105 | -0.229 | 0.191  |
| Property Developer Fees | Ideology*Treatment | 0.070  | 0.101 | -0.092 | 0.309  |
| Change Street Names     | Ideology           | 0.243  | 0.124 | 0.005  | 0.487  |
| Change Street Names     | Treatment          | 0.028  | 0.074 | -0.112 | 0.182  |
| Change Street Names     | Age                | 0.678  | 0.126 | 0.433  | 0.930  |
| Change Street Names     | Woman              | -0.049 | 0.054 | -0.157 | 0.053  |
| Change Street Names     | Education          | -0.086 | 0.078 | -0.240 | 0.067  |
| Change Street Names     | Place: Suburban    | 0.140  | 0.052 | 0.041  | 0.245  |
| Change Street Names     | Home Owner (Own)   | -0.045 | 0.060 | -0.164 | 0.071  |
| Change Street Names     | Home Owner (Other) | -0.134 | 0.077 | -0.285 | 0.018  |
| Change Street Names     | Population         | 0.027  | 0.104 | -0.168 | 0.246  |
| Change Street Names     | Ideology*Treatment | -0.040 | 0.095 | -0.255 | 0.128  |
| Women's Shelters        | Ideology           | 0.141  | 0.120 | -0.093 | 0.380  |
| Women's Shelters        | Treatment          | 0.152  | 0.072 | 0.004  | 0.289  |
| Women's Shelters        | Age                | -0.555 | 0.126 | -0.803 | -0.308 |
| Women's Shelters        | Woman              | -0.097 | 0.051 | -0.197 | 0.001  |
| Women's Shelters        | Education          | 0.049  | 0.079 | -0.096 | 0.214  |
| Women's Shelters        | Place: Suburban    | 0.038  | 0.051 | -0.062 | 0.138  |
| Women's Shelters        | Home Owner (Own)   | 0.087  | 0.059 | -0.028 | 0.202  |
| Women's Shelters        | Home Owner (Other) | -0.031 | 0.078 | -0.193 | 0.112  |
| Women's Shelters        | Population         | -0.113 | 0.102 | -0.334 | 0.072  |
| Women's Shelters        | Ideology*Treatment | 0.055  | 0.091 | -0.104 | 0.264  |
| Co-Op Housing           | Ideology           | 0.016  | 0.125 | -0.232 | 0.257  |
| Co-Op Housing           | Treatment          | 0.148  | 0.073 | 0.000  | 0.288  |
| Co-Op Housing           | Age                | -0.309 | 0.125 | -0.560 | -0.065 |
| Co-Op Housing           | Woman              | 0.021  | 0.050 | -0.077 | 0.119  |
| Co-Op Housing           | Education          | 0.049  | 0.077 | -0.103 | 0.203  |
| Co-Op Housing           | Place: Suburban    | 0.072  | 0.052 | -0.030 | 0.172  |
| Co-Op Housing           | Home Owner (Own)   | 0.332  | 0.060 | 0.217  | 0.451  |
| Co-Op Housing           | Home Owner (Other) | 0.179  | 0.078 | 0.031  | 0.335  |
| Co-Op Housing           | Population         | -0.006 | 0.104 | -0.207 | 0.205  |
| Co-Op Housing           | Ideology*Treatment | 0.016  | 0.094 | -0.169 | 0.208  |

|                         |                    |        |       |        |        |
|-------------------------|--------------------|--------|-------|--------|--------|
| Red Light Cameras       | Ideology           | -0.444 | 0.125 | -0.693 | -0.201 |
| Red Light Cameras       | Treatment          | -0.138 | 0.079 | -0.289 | 0.023  |
| Red Light Cameras       | Age                | -0.091 | 0.127 | -0.342 | 0.158  |
| Red Light Cameras       | Woman              | -0.076 | 0.053 | -0.180 | 0.025  |
| Red Light Cameras       | Education          | 0.206  | 0.086 | 0.052  | 0.389  |
| Red Light Cameras       | Place: Suburban    | -0.086 | 0.054 | -0.190 | 0.020  |
| Red Light Cameras       | Home Owner (Own)   | -0.146 | 0.059 | -0.260 | -0.028 |
| Red Light Cameras       | Home Owner (Other) | 0.022  | 0.083 | -0.140 | 0.189  |
| Red Light Cameras       | Population         | 0.208  | 0.123 | 0.009  | 0.486  |
| Red Light Cameras       | Ideology*Treatment | 0.004  | 0.103 | -0.217 | 0.206  |
| Police Property Thefts  | Ideology           | 0.324  | 0.123 | 0.088  | 0.575  |
| Police Property Thefts  | Treatment          | -0.216 | 0.074 | -0.353 | -0.060 |
| Police Property Thefts  | Age                | 0.296  | 0.122 | 0.060  | 0.533  |
| Police Property Thefts  | Woman              | -0.057 | 0.050 | -0.157 | 0.039  |
| Police Property Thefts  | Education          | 0.099  | 0.081 | -0.043 | 0.276  |
| Police Property Thefts  | Place: Suburban    | -0.026 | 0.050 | -0.126 | 0.074  |
| Police Property Thefts  | Home Owner (Own)   | -0.052 | 0.059 | -0.168 | 0.062  |
| Police Property Thefts  | Home Owner (Other) | -0.079 | 0.076 | -0.227 | 0.068  |
| Police Property Thefts  | Population         | 0.062  | 0.099 | -0.132 | 0.260  |
| Police Property Thefts  | Ideology*Treatment | -0.063 | 0.096 | -0.284 | 0.090  |
| Renter Rights           | Ideology           | 0.140  | 0.123 | -0.100 | 0.383  |
| Renter Rights           | Treatment          | 0.141  | 0.074 | -0.007 | 0.287  |
| Renter Rights           | Age                | -0.090 | 0.127 | -0.341 | 0.159  |
| Renter Rights           | Woman              | 0.062  | 0.051 | -0.037 | 0.163  |
| Renter Rights           | Education          | 0.027  | 0.080 | -0.124 | 0.191  |
| Renter Rights           | Place: Suburban    | 0.041  | 0.052 | -0.062 | 0.143  |
| Renter Rights           | Home Owner (Own)   | 0.314  | 0.061 | 0.200  | 0.438  |
| Renter Rights           | Home Owner (Other) | 0.101  | 0.076 | -0.046 | 0.256  |
| Renter Rights           | Population         | -0.088 | 0.109 | -0.329 | 0.105  |
| Renter Rights           | Ideology*Treatment | 0.007  | 0.093 | -0.175 | 0.207  |
| Public Security Cameras | Ideology           | 0.038  | 0.124 | -0.205 | 0.282  |
| Public Security Cameras | Treatment          | -0.328 | 0.074 | -0.478 | -0.184 |
| Public Security Cameras | Age                | 0.386  | 0.124 | 0.144  | 0.629  |
| Public Security Cameras | Woman              | 0.115  | 0.051 | 0.018  | 0.218  |

|                         |                    |        |       |        |        |
|-------------------------|--------------------|--------|-------|--------|--------|
| Public Security Cameras | Education          | 0.090  | 0.078 | -0.061 | 0.243  |
| Public Security Cameras | Place: Suburban    | -0.048 | 0.053 | -0.152 | 0.055  |
| Public Security Cameras | Home Owner (Own)   | -0.049 | 0.060 | -0.168 | 0.067  |
| Public Security Cameras | Home Owner (Other) | 0.012  | 0.076 | -0.136 | 0.164  |
| Public Security Cameras | Population         | 0.216  | 0.117 | 0.015  | 0.471  |
| Public Security Cameras | Ideology*Treatment | -0.037 | 0.095 | -0.239 | 0.143  |
| Speed Limit Increase    | Ideology           | 0.423  | 0.125 | 0.181  | 0.670  |
| Speed Limit Increase    | Treatment          | -0.249 | 0.080 | -0.420 | -0.102 |
| Speed Limit Increase    | Age                | -1.282 | 0.126 | -1.530 | -1.043 |
| Speed Limit Increase    | Woman              | -0.230 | 0.051 | -0.332 | -0.130 |
| Speed Limit Increase    | Education          | 0.166  | 0.083 | 0.006  | 0.331  |
| Speed Limit Increase    | Place: Suburban    | -0.133 | 0.052 | -0.236 | -0.031 |
| Speed Limit Increase    | Home Owner (Own)   | -0.067 | 0.060 | -0.186 | 0.051  |
| Speed Limit Increase    | Home Owner (Other) | 0.218  | 0.079 | 0.065  | 0.377  |
| Speed Limit Increase    | Population         | 0.033  | 0.110 | -0.182 | 0.254  |
| Speed Limit Increase    | Ideology*Treatment | 0.103  | 0.115 | -0.086 | 0.361  |
| Car-Sharing Programs    | Ideology           | 0.027  | 0.121 | -0.210 | 0.263  |
| Car-Sharing Programs    | Treatment          | 0.029  | 0.071 | -0.110 | 0.171  |
| Car-Sharing Programs    | Age                | 0.323  | 0.128 | 0.073  | 0.575  |
| Car-Sharing Programs    | Woman              | 0.093  | 0.053 | -0.007 | 0.200  |
| Car-Sharing Programs    | Education          | -0.009 | 0.078 | -0.159 | 0.152  |
| Car-Sharing Programs    | Place: Suburban    | 0.140  | 0.053 | 0.042  | 0.249  |
| Car-Sharing Programs    | Home Owner (Own)   | 0.029  | 0.061 | -0.093 | 0.147  |
| Car-Sharing Programs    | Home Owner (Other) | -0.033 | 0.077 | -0.191 | 0.112  |
| Car-Sharing Programs    | Population         | 0.127  | 0.111 | -0.051 | 0.383  |
| Car-Sharing Programs    | Ideology*Treatment | -0.011 | 0.086 | -0.191 | 0.161  |
| Affordable Housing      | Ideology           | 0.101  | 0.130 | -0.157 | 0.354  |
| Affordable Housing      | Treatment          | 0.059  | 0.079 | -0.110 | 0.203  |
| Affordable Housing      | Age                | 0.001  | 0.127 | -0.249 | 0.251  |
| Affordable Housing      | Woman              | 0.043  | 0.051 | -0.055 | 0.145  |
| Affordable Housing      | Education          | 0.113  | 0.084 | -0.039 | 0.294  |
| Affordable Housing      | Place: Suburban    | 0.059  | 0.052 | -0.044 | 0.161  |
| Affordable Housing      | Home Owner (Own)   | 0.219  | 0.060 | 0.102  | 0.337  |
| Affordable Housing      | Home Owner (Other) | 0.177  | 0.078 | 0.029  | 0.335  |

|                             |                    |        |       |        |        |
|-----------------------------|--------------------|--------|-------|--------|--------|
| Affordable Housing          | Population         | 0.088  | 0.111 | -0.108 | 0.329  |
| Affordable Housing          | Ideology*Treatment | 0.065  | 0.107 | -0.109 | 0.315  |
| Public Transit Improvements | Ideology           | -0.169 | 0.120 | -0.406 | 0.063  |
| Public Transit Improvements | Treatment          | 0.182  | 0.072 | 0.040  | 0.324  |
| Public Transit Improvements | Age                | 0.174  | 0.125 | -0.069 | 0.420  |
| Public Transit Improvements | Woman              | 0.019  | 0.051 | -0.083 | 0.117  |
| Public Transit Improvements | Education          | -0.168 | 0.087 | -0.358 | -0.021 |
| Public Transit Improvements | Place: Suburban    | -0.013 | 0.053 | -0.119 | 0.087  |
| Public Transit Improvements | Home Owner (Own)   | 0.072  | 0.059 | -0.042 | 0.189  |
| Public Transit Improvements | Home Owner (Other) | 0.045  | 0.075 | -0.095 | 0.199  |
| Public Transit Improvements | Population         | -0.139 | 0.105 | -0.373 | 0.040  |
| Public Transit Improvements | Ideology*Treatment | -0.004 | 0.087 | -0.178 | 0.178  |
| Preserve Natural Areas      | Ideology           | -0.362 | 0.125 | -0.608 | -0.117 |
| Preserve Natural Areas      | Treatment          | 0.063  | 0.078 | -0.104 | 0.205  |
| Preserve Natural Areas      | Age                | -0.220 | 0.126 | -0.464 | 0.029  |
| Preserve Natural Areas      | Woman              | -0.088 | 0.051 | -0.190 | 0.011  |
| Preserve Natural Areas      | Education          | 0.007  | 0.080 | -0.153 | 0.164  |
| Preserve Natural Areas      | Place: Suburban    | -0.038 | 0.053 | -0.143 | 0.066  |
| Preserve Natural Areas      | Home Owner (Own)   | -0.152 | 0.060 | -0.270 | -0.036 |
| Preserve Natural Areas      | Home Owner (Other) | 0.039  | 0.076 | -0.113 | 0.186  |
| Preserve Natural Areas      | Population         | -0.019 | 0.103 | -0.223 | 0.184  |
| Preserve Natural Areas      | Ideology*Treatment | 0.062  | 0.108 | -0.111 | 0.313  |
| Vehicle Charging Stations   | Ideology           | -0.010 | 0.120 | -0.248 | 0.224  |
| Vehicle Charging Stations   | Treatment          | 0.061  | 0.069 | -0.076 | 0.194  |
| Vehicle Charging Stations   | Age                | 0.065  | 0.122 | -0.169 | 0.306  |
| Vehicle Charging Stations   | Woman              | -0.059 | 0.050 | -0.158 | 0.035  |
| Vehicle Charging Stations   | Education          | -0.091 | 0.078 | -0.257 | 0.049  |
| Vehicle Charging Stations   | Place: Suburban    | 0.044  | 0.049 | -0.053 | 0.139  |
| Vehicle Charging Stations   | Home Owner (Own)   | -0.025 | 0.058 | -0.140 | 0.086  |
| Vehicle Charging Stations   | Home Owner (Other) | -0.052 | 0.073 | -0.202 | 0.088  |
| Vehicle Charging Stations   | Population         | -0.041 | 0.092 | -0.232 | 0.138  |
| Vehicle Charging Stations   | Ideology*Treatment | 0.006  | 0.080 | -0.151 | 0.177  |
| Car-Free Zones              | Ideology           | 0.066  | 0.123 | -0.171 | 0.315  |
| Car-Free Zones              | Treatment          | 0.179  | 0.080 | 0.040  | 0.354  |

|                            |                    |        |       |        |        |
|----------------------------|--------------------|--------|-------|--------|--------|
| Car-Free Zones             | Age                | 0.478  | 0.123 | 0.234  | 0.717  |
| Car-Free Zones             | Woman              | 0.084  | 0.051 | -0.016 | 0.185  |
| Car-Free Zones             | Education          | -0.171 | 0.081 | -0.342 | -0.023 |
| Car-Free Zones             | Place: Suburban    | 0.136  | 0.052 | 0.039  | 0.241  |
| Car-Free Zones             | Home Owner (Own)   | 0.053  | 0.059 | -0.065 | 0.168  |
| Car-Free Zones             | Home Owner (Other) | -0.119 | 0.076 | -0.271 | 0.029  |
| Car-Free Zones             | Population         | -0.065 | 0.101 | -0.275 | 0.127  |
| Car-Free Zones             | Ideology*Treatment | -0.093 | 0.106 | -0.351 | 0.059  |
| Energy-Efficient Buildings | Ideology           | 0.099  | 0.120 | -0.142 | 0.332  |
| Energy-Efficient Buildings | Treatment          | 0.066  | 0.073 | -0.088 | 0.198  |
| Energy-Efficient Buildings | Age                | -0.473 | 0.122 | -0.717 | -0.237 |
| Energy-Efficient Buildings | Woman              | -0.057 | 0.049 | -0.153 | 0.040  |
| Energy-Efficient Buildings | Education          | -0.038 | 0.077 | -0.193 | 0.110  |
| Energy-Efficient Buildings | Place: Suburban    | -0.020 | 0.050 | -0.118 | 0.077  |
| Energy-Efficient Buildings | Home Owner (Own)   | -0.061 | 0.058 | -0.177 | 0.052  |
| Energy-Efficient Buildings | Home Owner (Other) | -0.009 | 0.073 | -0.160 | 0.126  |
| Energy-Efficient Buildings | Population         | -0.111 | 0.100 | -0.333 | 0.066  |
| Energy-Efficient Buildings | Ideology*Treatment | 0.069  | 0.095 | -0.084 | 0.292  |
| Prioritize Walkability     | Ideology           | 0.084  | 0.121 | -0.154 | 0.323  |
| Prioritize Walkability     | Treatment          | -0.018 | 0.073 | -0.172 | 0.116  |
| Prioritize Walkability     | Age                | 0.242  | 0.125 | 0.003  | 0.490  |
| Prioritize Walkability     | Woman              | 0.065  | 0.050 | -0.033 | 0.163  |
| Prioritize Walkability     | Education          | -0.082 | 0.079 | -0.250 | 0.063  |
| Prioritize Walkability     | Place: Suburban    | 0.089  | 0.051 | -0.009 | 0.194  |
| Prioritize Walkability     | Home Owner (Own)   | 0.029  | 0.059 | -0.088 | 0.144  |
| Prioritize Walkability     | Home Owner (Other) | 0.046  | 0.074 | -0.100 | 0.193  |
| Prioritize Walkability     | Population         | 0.064  | 0.103 | -0.117 | 0.290  |
| Prioritize Walkability     | Ideology*Treatment | 0.016  | 0.089 | -0.148 | 0.214  |

## References

- Clifford, Scott and Carlisle Rainey. 2024. "Estimators for Topic-Sampling Designs." *Political Analysis* pp. 1–14. [https://www.cambridge.org/core/product/identifier/S1047198724000019/type/journal\\_article](https://www.cambridge.org/core/product/identifier/S1047198724000019/type/journal_article).
- Clifford, Scott, Thomas J. Leeper and Carlisle Rainey. 2024. "Generalizing Survey Experiments Using Topic Sampling: An Application to Party Cues." *Political Behavior* 46(2):1233–1256. <https://link.springer.com/10.1007/s11109-023-09870-1>.
